# Supplementary material for: Tristable data storage device of soluble polyimides based on novel asymmetrical diamines containing carbazole
Source: Royal Society of Chemistry journal article supplement (doi:10.1039/c5py02002f), 2016-01-01
Supplement: c5py02002f1.pdf [file c5py02002f1.pdf]

## Supporting Information

### Tristable data-storage device of soluble polyimides based on novel asymmetrical diamines containing carbazole

Jing Zhao<sup>a</sup>, Ling Peng<sup>a</sup>, Ya-Liang Zhu<sup>a</sup>, An-ming Zheng<sup>b</sup> and Ying-Zhong Shen<sup>a\*</sup>

Supporting figures:

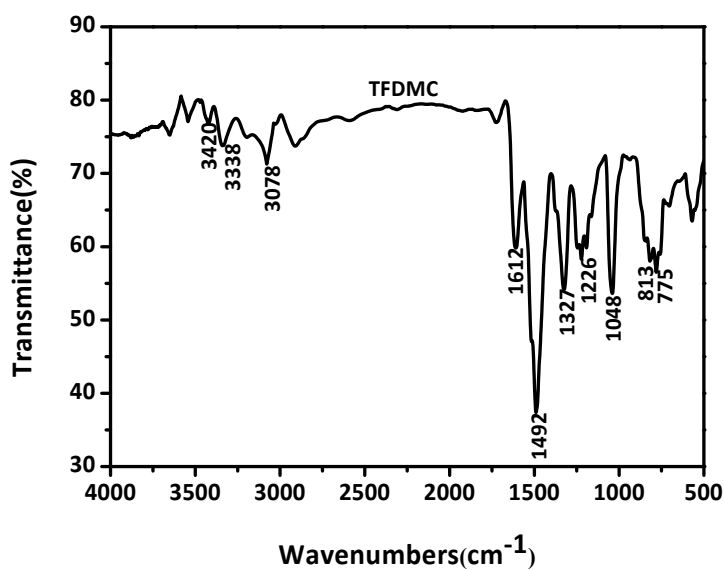

Figure S1. FT-IR spectra of TFDMC.

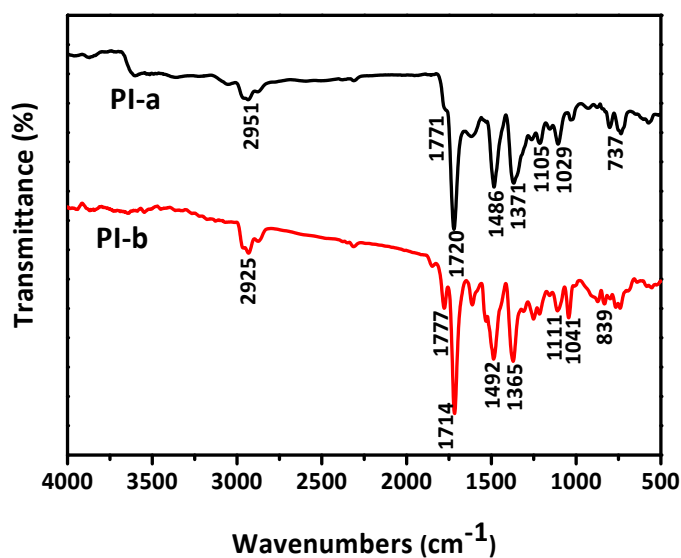

Figure S2. FT-IR spectra of PIs.

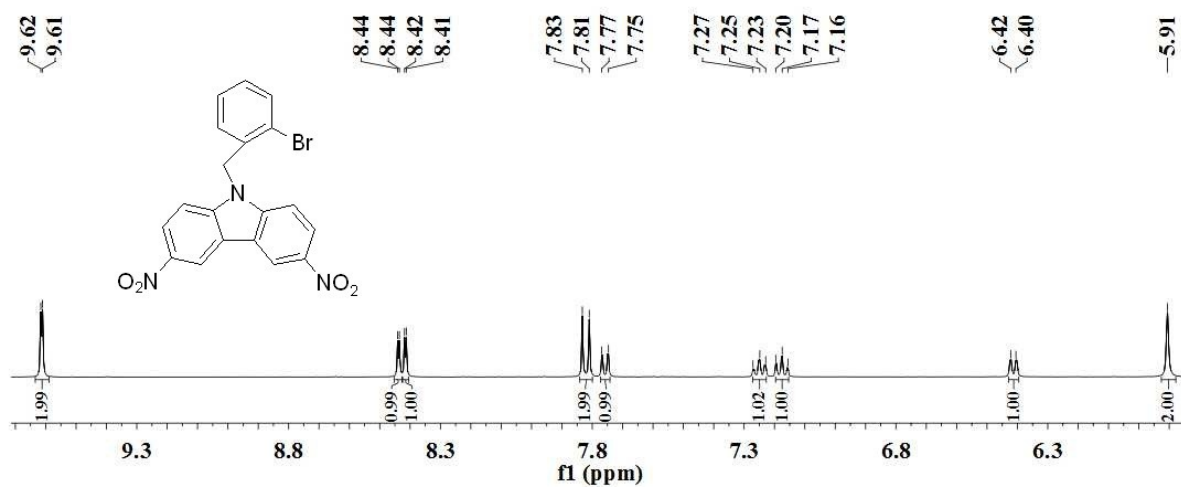

Figure S3.  $^1\text{H NMR}$  spectrum of (2) in  $\text{DMSO-}d_6$ .

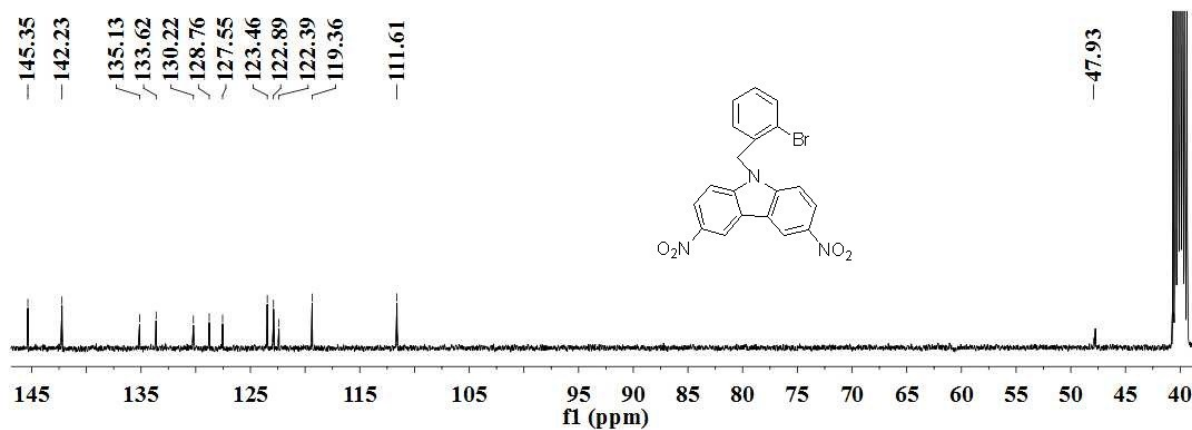

Figure S4.  $^{13}\text{C NMR}$  spectrum of (2) in  $\text{DMSO-}d_6$ .

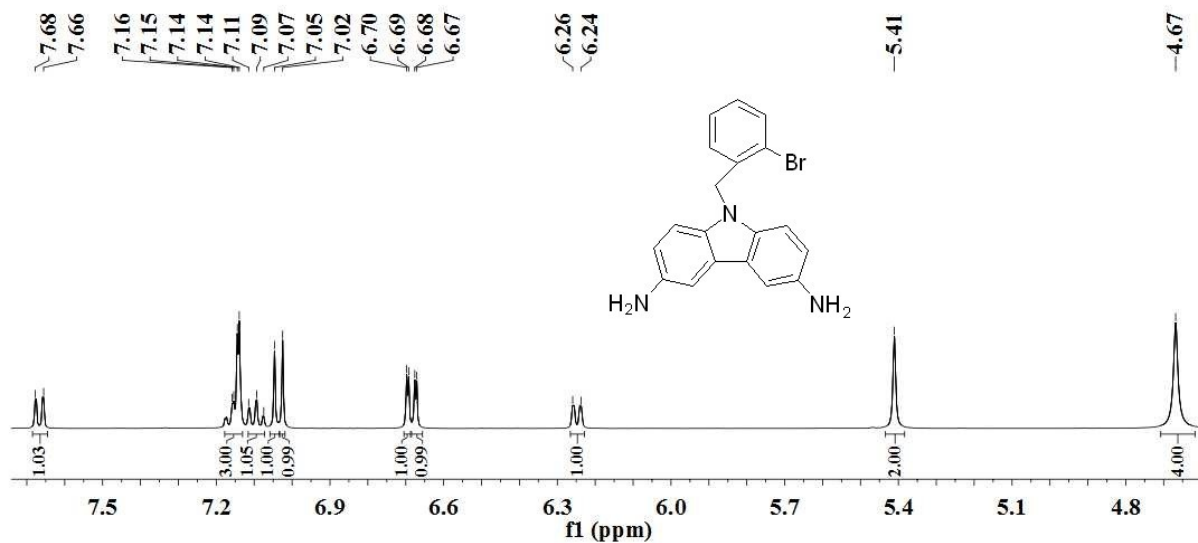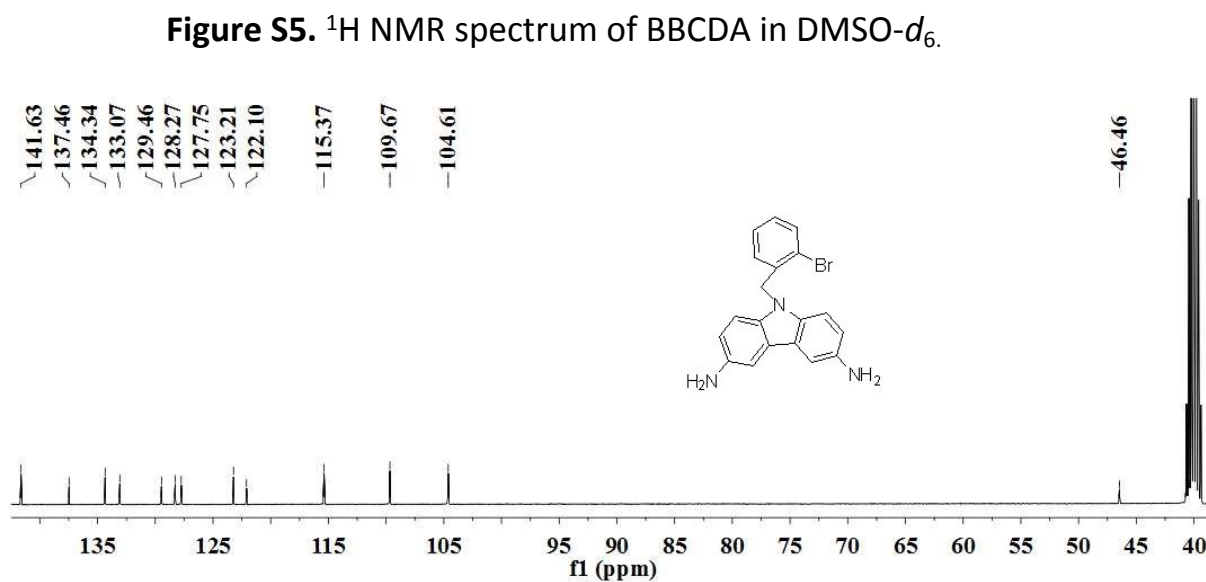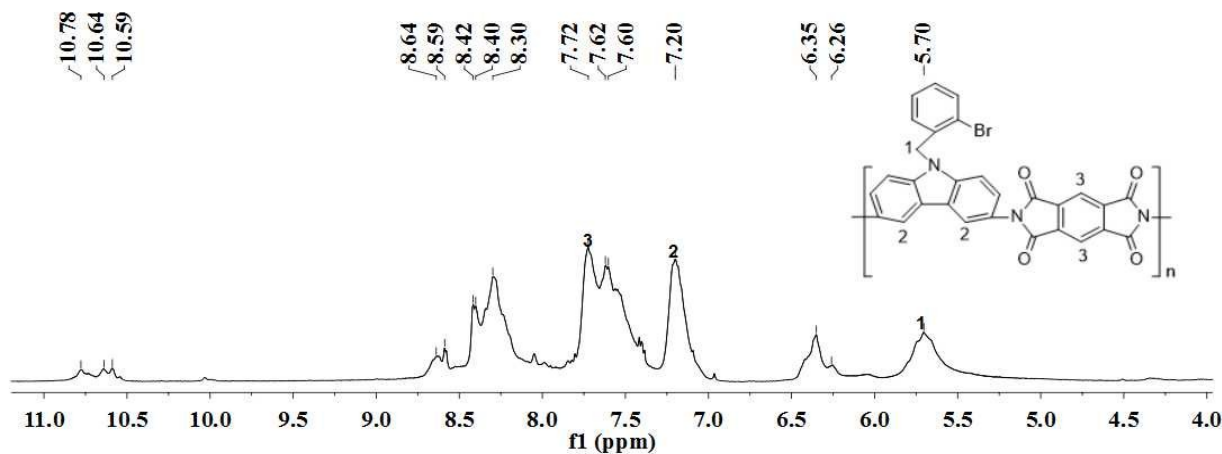

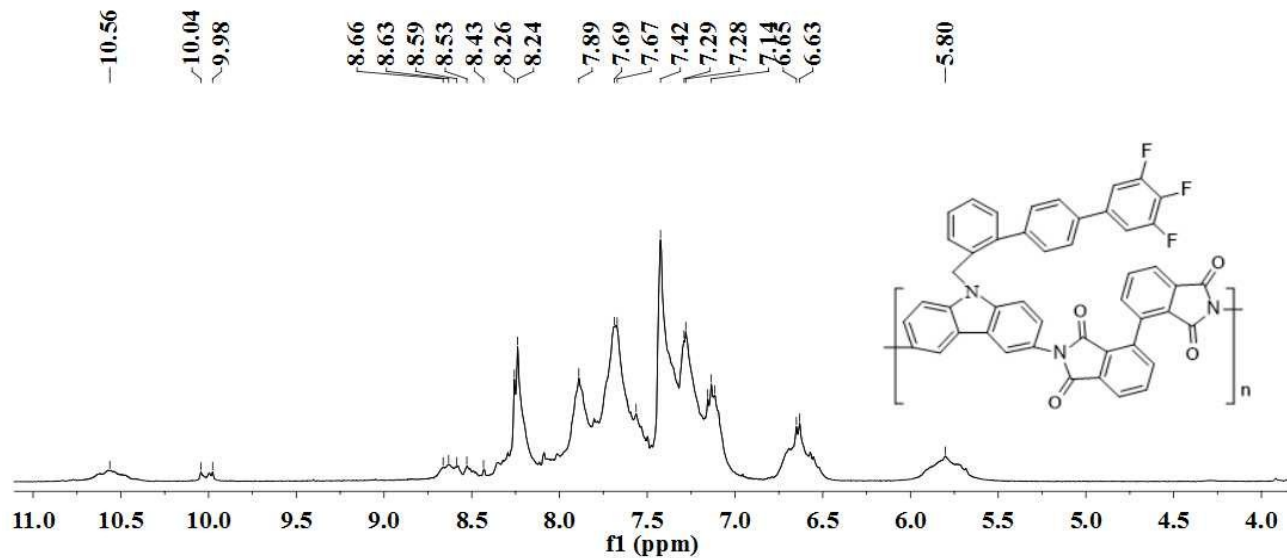

**Figure S7.**  $^1\text{H}$  NMR spectra of PI-a and PI-b in  $\text{DMSO-}d_6$ .

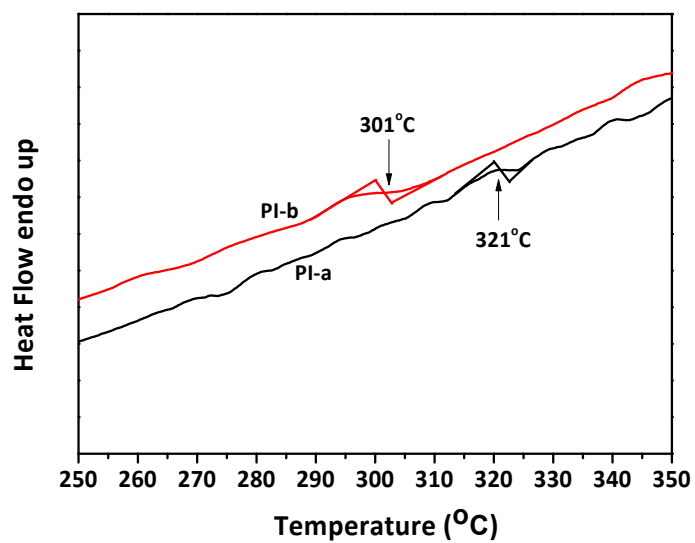

**Figure S8.** DSC curves of PIs.

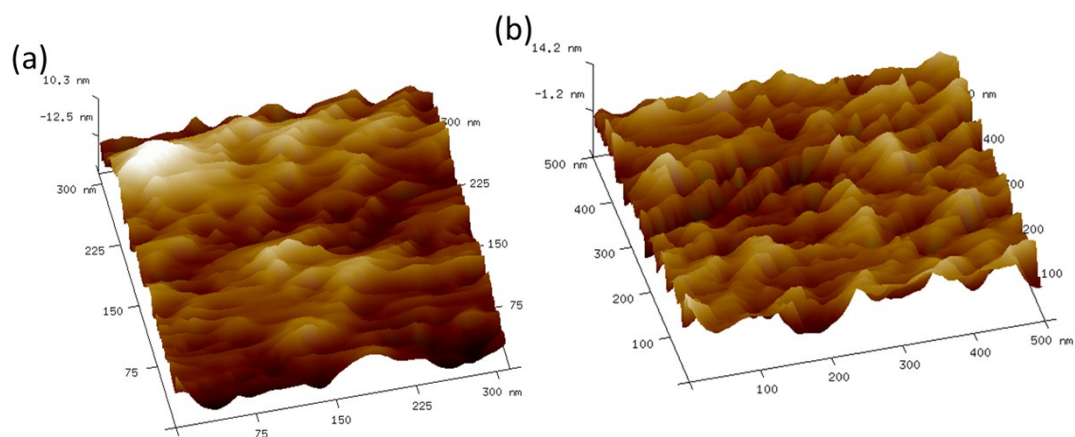

**Figure S9.** Atomic Force Microscope three-dimensional images (surface area of  $0.5 \times 0.5 \mu\text{m}^2$ ) of PI-a and PI-b.
